# Supplementary material for: The effects of extensive reading on young Korean students’ construction development
Source: publisher site journal article supplement (doi:10.1515/iral-2019-0076), 2021-01-28
Supplement: Supplementary file 1 [file j_iral-2019-0076_suppl.docx]

**Appendix A**

**Sample for after-reading activity worksheets: Book summary**

Choose one event in the book that you think was the most interesting, and answer these questions.

Name: _________________

Book Title: ________________

Date: _________________

1. Who: ________________________________________

2. When: ________________________________________

3. What: ________________________________________

4. Where: ________________________________________

5. How: ________________________________________

6. Why: ________________________________________

**Appendix B**

**Sample for after-reading activity worksheets: Book summary**

Write a letter to the **author** or any **character** from the book that you have read.

Name: _________________

Date: _________________

Title: ________________

Author: _________________

Dear: ______________ (Greeting)

__________________________________________________________________

__________________________________________________________________

__________________________________________________________________

__________________________________________________________________

Sincerely,

______________

**Appendix C**

**Total number of constructions produced by each group in the pre- and post-evaluation sessions**

| Variable | Baseline group |  | |  | ER group | |
| --- | --- | --- | --- | --- | --- | --- |
|  | | | |  |  |
| Pre-evaluation | | Post-evaluation | | Pre-evaluation | Post-evaluation |
| IU | 192 | | 175 | | 231 | 199 |
| IM | 18 | | 23 | | 49 | 41 |
| IR | 15 | | 10 | | 16 | 18 |
| TR | 245 | | 233 | | 298 | 284 |
| DI | 0 | | 3 | | 0 | 13 |
| CM | 7 | | 13 | | 11 | 30 |
| RT | 2 | | 3 | | 2 | 4 |

Note. IU: Intransitive-unergative; IM: Intransitive-motion; IR: Intransitive-resultative; TR: Transitive; CM: Caused-motion; DI: Ditransitive; RT: Resultative
